# Supplementary material for: The Determinants of the 13-Year Risk of Incident Atrial Fibrillation in a Russian Population Cohort of Middle and Elderly Age
Source: MDPI journal article supplement (doi:10.3390/jpm12010122), 2022-01-17
Supplement: s1 [file s1]

## Supplementary Materials:

**Supplementary Table S1. Associations between risk factors and 13-risk of incident AF. Cox-regression analysis, age- and multivariable-adjusted models (The HAPIEE study, Russian population cohort free from baseline CVD, n=3871).**

| Risk Factors                            | Model 1                 | Model 2                 | Model 3                 |
|-----------------------------------------|-------------------------|-------------------------|-------------------------|
|                                         | HR (95% CI)             | HR (95% CI)             | HR (95% CI)             |
| Age, per 1 year                         | <b>1.10 (1.07-1.13)</b> | <b>1.09 (1.06-1.12)</b> | <b>1.10 (1.07-1.14)</b> |
| Sex: male vs. female                    | <b>1.95 (1.36-2.79)</b> | <b>2.02 (1.17-3.47)</b> | <b>2.20 (1.26-3.87)</b> |
| Heart rate, per 1 b / min               | 1.00 (0.98-1.02)        | 0.99 (0.98-1.01)        |                         |
| BMI, per 1 kg/m <sup>2</sup>            | <b>1.10 (1.07-1.14)</b> | <b>1.10 (1.06-1.15)</b> | <b>1.11 (1.07-1.15)</b> |
| SBP, per 1 mmHg                         | <b>1.02 (1.01-1.02)</b> | <b>1.02 (1.01-1.02)</b> |                         |
| DBP, per 1 mmHg                         | <b>1.03 (1.01-1.04)</b> |                         |                         |
| TC, per 1 mmol/L                        | <b>0.81 (0.69-0.95)</b> | <b>0.79 (0.66-0.95)</b> | <b>0.79 (0.67-0.94)</b> |
| LDLC, per 1 mmol/L                      | <b>0.79 (0.66-0.94)</b> |                         |                         |
| HDLC, per 1 mmol/L                      | 0.78 (0.45-1.35)        |                         |                         |
| TG, per 1 mmol/L                        | 0.97 (0.76-1.23)        |                         |                         |
| Glucose, per 1 mmol/L                   | 0.91 (0.76-1.09)        |                         |                         |
| GGTP, per 1 U/L                         | 1.00 (1.00-1.01)        |                         |                         |
| HT, yes vs. no                          | <b>1.75 (1.15-2.65)</b> |                         | 1.50 (0.97-2.33)        |
| DM, yes vs. no                          | 0.94 (0.49-1.79)        |                         | 0.83 (0.43-1.6)         |
| Alcohol, per 20 g per drinking occasion | 1.22 (1.02-1.22)        | 1.00 (1.00-1.01)        | 1.0 (1.00-1.01)         |
| <i>Smoking status:</i>                  |                         |                         |                         |
| - former smoker vs. never               | 1.20 (0.68-2.11)        | 1.21 (0.68-2.14)        | 1.18 (0.66-2.09)        |
| -current smoker vs. never               | 1.18 (0.71-1.98)        | 1.39 (0.81-2.40)        | 1.14 (0.80-2.35)        |
| <i>Level of education:</i>              |                         |                         |                         |
| - other vs. higher                      | 1.18 (0.80-1.73)        |                         | 1.14 (0.76-1.70)        |
| <i>Marital status:</i>                  |                         |                         |                         |
| - single vs. married                    | 1.18 (0.77-1.81)        |                         | 1.15 (0.73-1.79)        |

HR - hazard ratio, CI - confidence interval. Model 1: age- and sex- adjusted; Model 2: adjusted for age, sex, BMI, SBP, TC, TG, smoking, alcohol consumptions. Model 3: for age, sex, BMI, TC, HT, DM, smoking, alcohol consumptions, education and marital status

**Supplementary Table S2. Associations between risk factors and 13-risk of incident AF. Cox-regression analysis, age- and multivariable-adjusted models (The HAPIEE study, Russian population cohort, n=5759).**

| Risk Factors                            | Model 1          | Model 2          | Model 3          |
|-----------------------------------------|------------------|------------------|------------------|
|                                         | HR (95% CI)      | HR (95% CI)      | HR (95% CI)      |
| Age, per 1 year                         | 1.09 (1.06-1.12) | 1.09 (1.06-1.12) | 1.10 (1.07-1.14) |
| Sex: male vs. female                    | 1.96 (1.37-2.79) | 1.94 (1.18-3.18) | 2.20 (1.25-3.85) |
| CVD at baseline                         | 2.48 (1.74-3.38) | 2.22 (1.57-3.34) | 2.25 (1.59-3.17) |
| Heart rate, per 1 b / min               | 1.00 (0.98-1.01) | 0.99 (0.97-1.01) |                  |
| BMI, per 1 kg/m <sup>2</sup>            | 1.10 (1.06-1.14) | 1.09 (1.05-1.13) | 1.10 (1.07-1.14) |
| SBP, per 1 mmHg                         | 1.02 (1.01-1.02) | 1.02 (1.01-1.02) |                  |
| DBP, per 1 mmHg                         | 1.03 (1.02-1.04) |                  |                  |
| TC, per 1 mmol/L                        | 0.80 (0.68-0.94) | 0.76 (0.64-0.90) | 0.77 (0.65-0.91) |
| LDLC, per 1 mmol/L                      | 0.78 (0.65-0.93) |                  |                  |
| HDLC, per 1 mmol/L                      | 0.87 (0.51-1.49) |                  |                  |
| TG, per 1 mmol/L                        | 0.96 (0.76-1.23) |                  |                  |
| Glucose, per 1 mmol/L                   | 0.90 (0.73-1.08) |                  |                  |
| GGTP, per 1 U/L                         | 1.00 (1.00-1.01) |                  |                  |
| HT, yes vs. no                          | 1.73 (1.14-2.62) |                  | 1.47 (0.95-2.27) |
| DM, yes vs. no                          | 1.12 (0.60-2.35) |                  | 1.34 (0.67-2.27) |
| Alcohol, per 20 g per drinking occasion | 1.08 (0.98-1.20) | 1.06 (0.96-1.17) | 1.04 (0.94-1.15) |
| <i>Smoking status:</i>                  |                  |                  |                  |
| - former smoker vs. never               | 1.20 (0.68-2.11) | 1.21 (0.68-2.12) | 1.17 (0.66-2.10) |
| -current smoker vs. never               | 1.15 (0.69-1.93) | 1.35 (0.79-2.31) | 1.13 (0.77-2.30) |
| <i>Level of education:</i>              |                  |                  |                  |
| - other vs. higher                      | 1.17 (0.80-1.72) |                  | 1.13 (0.76-1.70) |
| <i>Marital status:</i>                  |                  |                  |                  |
| - single vs. married                    | 1.17 (0.77-1.83) |                  | 1.16 (0.74-1.81) |

HR - hazard ratio, CI - confidence interval. Model 1: age- and sex- adjusted; Model 2: adjusted for age, sex, BMI, SBP, TC, TG, smoking, alcohol consumptions, baseline CVD. Model 3: for age, sex, BMI, TC, HT, DM, smoking, alcohol consumptions, education and marital status, baseline CVD
